# Supplementary material for: Loneliness, social isolation and social relationships: what are we measuring? A novel framework for classifying and comparing tools
Source: PubMed Central journal article supplement (PMC4838704; doi:10.1136/bmjopen-2015-010799), 2016-04-18
Supplement: bmjopen-2015-010799supp_appendix3.pdf [file bmjopen-2015-010799supp_appendix3.pdf]

### Appendix 3. List of tools identified, with references

| Tool                                                                                                  | Studies in which the tool was used                                                                                                                                                                                                                                                                                                                                                                                                                                                                                                                                                                                                                                                                                                                                                                                                                                                                                                                                                                                                                                                                                                                                                                                                                                                                                                                                                                                                                                                                                                                                                                                          |
|-------------------------------------------------------------------------------------------------------|-----------------------------------------------------------------------------------------------------------------------------------------------------------------------------------------------------------------------------------------------------------------------------------------------------------------------------------------------------------------------------------------------------------------------------------------------------------------------------------------------------------------------------------------------------------------------------------------------------------------------------------------------------------------------------------------------------------------------------------------------------------------------------------------------------------------------------------------------------------------------------------------------------------------------------------------------------------------------------------------------------------------------------------------------------------------------------------------------------------------------------------------------------------------------------------------------------------------------------------------------------------------------------------------------------------------------------------------------------------------------------------------------------------------------------------------------------------------------------------------------------------------------------------------------------------------------------------------------------------------------------|
| Berkman-Syme Social Network Index [1]                                                                 | <p>Avendano M, Kawachi I, Van Lenthe F, et al. Socioeconomic status and stroke incidence in the US elderly: the role of risk factors in the EPESE study. <i>Stroke</i> 2006;<b>37</b>(6):1368-73</p> <p>Eng PM, Rimm EB, Fitzmaurice G, Kawachi I. Social ties and change in social ties in relation to subsequent total and cause-specific mortality and coronary heart disease incidence in men. <i>American Journal of Epidemiology</i> 2002;<b>155</b>(8):700-09.</p> <p>Gafarov VV, Panov DO, Gromova EA, et al. The influence of social support on risk of acute cardiovascular diseases in female population aged 25-64 in Russia. <i>International journal of circumpolar health</i> 2013;<b>72</b>:21210.</p> <p>Kang SH, Bloom JR. Social support and cancer screening among older black Americans. <i>Journal of the National Cancer Institute</i> 1993;<b>85</b>(9j, 7503089):737-42.</p> <p>Kawachi I, Colditz GA, Ascherio A, et al. A prospective study of social networks in relation to total mortality and cardiovascular disease in men in the USA. <i>Journal of Epidemiology and Community Health</i> 1996;<b>50</b>(3):245-51</p> <p>Parboosingh EJ, Larsen DE. Factors Influencing Frequency and Appropriateness of Utilization of the Emergency Room by the Elderly. <i>Medical Care</i> 1987;<b>25</b>(12):1139-47.</p> <p>Sykes D, Arveiler D, Salters CP, et al. Psychosocial risk factors for heart disease in France and Northern Ireland: the Prospective Epidemiological Study of Myocardial Infarction (PRIME). <i>International Journal of Epidemiology</i> 2002;<b>31</b>(6):1227-34.</p> |
| 11-item de Jong Gierveld Loneliness Scale [2]                                                         | <p>Iecovich E, Biderman A. Attendance in adult day care centers and its relation to loneliness among frail older adults. <i>International Psychogeriatrics</i> 2012;<b>24</b>(3):439-48.</p> <p>Kempen GI, Suurmeijer TP. Factors influencing professional home care utilization among the elderly. <i>Social Science &amp; Medicine</i> 1991;<b>32</b>(1):77-81.</p>                                                                                                                                                                                                                                                                                                                                                                                                                                                                                                                                                                                                                                                                                                                                                                                                                                                                                                                                                                                                                                                                                                                                                                                                                                                       |
| 35-item Duke Social Support Index [3]                                                                 | <p>Hastings SN, George LK, Fillenbaum GG, Park RS, Burchett BM, Schmader KE. Does lack of social support lead to more ED visits for older adults? <i>The American Journal of Emergency Medicine</i> 2008;<b>26</b>(4):454-61.</p>                                                                                                                                                                                                                                                                                                                                                                                                                                                                                                                                                                                                                                                                                                                                                                                                                                                                                                                                                                                                                                                                                                                                                                                                                                                                                                                                                                                           |
| 11-item Duke Social Support Index [4]                                                                 | <p>Strodl E, Kenardy J, Aroney C. Perceived stress as a predictor of the self-reported new diagnosis of symptomatic CHD in older women. <i>International Journal of Behavioral Medicine</i> 2003;<b>10</b>(3):205-20.</p> <p>Strodl E, Kenardy J. The 5-item mental health index predicts the initial diagnosis of nonfatal stroke in older women. <i>Journal of Women's Health</i> 2008;<b>17</b>(6):979-86.</p>                                                                                                                                                                                                                                                                                                                                                                                                                                                                                                                                                                                                                                                                                                                                                                                                                                                                                                                                                                                                                                                                                                                                                                                                           |
| 4-item Duke Social Support Index [5]                                                                  | <p>Longman JM, I Rolfe M, Passey MD, et al. Frequent hospital admission of older people with chronic disease: a cross-sectional survey with telephone follow-up and data linkage. <i>BMC Health Services Research</i> 2012;<b>12</b>:373.</p>                                                                                                                                                                                                                                                                                                                                                                                                                                                                                                                                                                                                                                                                                                                                                                                                                                                                                                                                                                                                                                                                                                                                                                                                                                                                                                                                                                               |
| Duke-UNC Functional Social Support Questionnaire [6]                                                  | <p>Ottenbacher KJ, Graham JE, Ottenbacher AJ, et al. Hospital readmission in persons with stroke following postacute inpatient rehabilitation. <i>The Journals of Gerontology: Series A, Biological Sciences and Medical Sciences</i> 2012;<b>67</b>(8): 875–881.</p> <p>Stoddart H, Whitley E, Harvey I, Sharp D. What determines the use of home care services by elderly people? <i>Health &amp; Social Care in the Community</i> 2002;<b>10</b>(5):348-60.</p>                                                                                                                                                                                                                                                                                                                                                                                                                                                                                                                                                                                                                                                                                                                                                                                                                                                                                                                                                                                                                                                                                                                                                          |
| ENRICH Social Support Inventory (ESSI) [7]                                                            | <p>Coventry PA, Gemmell I, Todd CJ. Psychosocial risk factors for hospital readmission in COPD patients on early discharge services: A cohort study. <i>BMC Pulmonary Medicine</i> 2011;<b>11</b>.</p>                                                                                                                                                                                                                                                                                                                                                                                                                                                                                                                                                                                                                                                                                                                                                                                                                                                                                                                                                                                                                                                                                                                                                                                                                                                                                                                                                                                                                      |
| Gijón Scale for the elderly's social-family assessment, family and social relationships subscales [8] | <p>Lorén Guerrero L, Gascón Catalán M. Biopsychosocial factors related to the length of hospital stay in older people. <i>Revista Latino-Americana de Enfermagem</i> 2011;<b>19</b>(6):1377-84.</p>                                                                                                                                                                                                                                                                                                                                                                                                                                                                                                                                                                                                                                                                                                                                                                                                                                                                                                                                                                                                                                                                                                                                                                                                                                                                                                                                                                                                                         |
| 12-item Interpersonal Support Evaluation List (ISEL) [9]                                              | <p>Eakin EG, Strycker LA. Awareness and barriers to use of cancer support and information resources by HMO patients with breast, prostate, or colon cancer: patient and provider perspectives. <i>Psycho-oncology</i> 2001;<b>10</b>(2):103-13.</p>                                                                                                                                                                                                                                                                                                                                                                                                                                                                                                                                                                                                                                                                                                                                                                                                                                                                                                                                                                                                                                                                                                                                                                                                                                                                                                                                                                         |
| Interview Measure of Social Relationships [10]                                                        | <p>Lesage AD, Charron M, Puntí R, et al. Factors related to admission of new patients consulting geriatric psychiatric services in Montreal. <i>International Journal of Geriatric Psychiatry</i> 1994;<b>9</b>(8):663-72.</p>                                                                                                                                                                                                                                                                                                                                                                                                                                                                                                                                                                                                                                                                                                                                                                                                                                                                                                                                                                                                                                                                                                                                                                                                                                                                                                                                                                                              |
| Litwin Support Network Types [11]                                                                     | <p>Litwin, H. Support network type and health service utilization. <i>Research on Aging</i> 1997;<b>19</b>:274–299.</p>                                                                                                                                                                                                                                                                                                                                                                                                                                                                                                                                                                                                                                                                                                                                                                                                                                                                                                                                                                                                                                                                                                                                                                                                                                                                                                                                                                                                                                                                                                     |
| 10-item Lubben Social Network Scale [12]                                                              | <p>Nagayoshi M, Everson-Rose SA, Iso H, Mosley TH, Rose KM, Lutsey PL. Social network, social support, and the risk of incident stroke: The atherosclerosis risk in communities study. <i>Circulation</i> 2014;<b>129</b>: 2868-73.</p> <p>Player MS, King DE, Mainous AG, 3rd, Geesey ME. Psychosocial factors and progression from prehypertension to hypertension or coronary heart disease. <i>Annals of Family Medicine</i> 2007;<b>5</b>(5):403-11.</p>                                                                                                                                                                                                                                                                                                                                                                                                                                                                                                                                                                                                                                                                                                                                                                                                                                                                                                                                                                                                                                                                                                                                                               |

|                                                                               |                                                                                                                                                                                                                                                                                                                                                                                                                                                                                                                                                                                                                                                                                                                                                                                                                                                                                                                                                                                                  |
|-------------------------------------------------------------------------------|--------------------------------------------------------------------------------------------------------------------------------------------------------------------------------------------------------------------------------------------------------------------------------------------------------------------------------------------------------------------------------------------------------------------------------------------------------------------------------------------------------------------------------------------------------------------------------------------------------------------------------------------------------------------------------------------------------------------------------------------------------------------------------------------------------------------------------------------------------------------------------------------------------------------------------------------------------------------------------------------------|
|                                                                               | <p>Mistry R, Rosansky J, McGuire J, McDermott C, Jarvik L, Group UC. Social isolation predicts re-hospitalization in a group of older American veterans enrolled in the UPBEAT Program. <i>International Journal of Geriatric Psychiatry</i> 2001;<b>16</b>:950-959</p> <p>Stoddart H, Whitley E, Harvey I, Sharp D. What determines the use of home care services by elderly people? <i>Health &amp; Social Care in the Community</i> 2002;<b>10</b>(5):348-60.</p>                                                                                                                                                                                                                                                                                                                                                                                                                                                                                                                             |
| 6-item Lubben Social Network Scale [13]                                       | <p>Iliffe S, Kharicha K, Harari D, Swift C, Gillmann G, Stuck AE. Health risk appraisal in older people 2: The implications for clinicians and commissioners of social isolation risk in older people. <i>British Journal of General Practice</i> 2007;<b>57</b>(537):277-82.</p> <p>Kobayashi KM, Cloutier-Fisher D, Roth M. Making meaningful connections: a profile of social isolation and health among older adults in small town and small city, British Columbia. <i>Journal of Aging and Health</i> 2009;<b>21</b>(2):374-97.</p> <p>Nelms L, Johnson V, Teshuva K, Foreman P, Stanley J. Social and health factors affecting community service use by vulnerable older people. <i>Australian Social Work</i> 2009;<b>62</b>(4):507-24.</p> <p>Simning A, Van Wijngaarden E, Fisher SG, Richardson TM, Conwell Y. Mental healthcare need and service utilization in older adults living in public housing. <i>American Journal of Geriatric Psychiatry</i> 2012;<b>20</b>(5):441-51.</p> |
| Medical Outcomes Study (MOS) Social Support Survey [14]                       | <p>de Boer AG, Sprangers MA, Speelman HD, de Haes HC. Predictors of health care use in patients with Parkinson's disease: a longitudinal study. <i>Movement Disorders</i> 1999;<b>14</b>(5):772-9</p>                                                                                                                                                                                                                                                                                                                                                                                                                                                                                                                                                                                                                                                                                                                                                                                            |
| Multidimensional Scale of Perceived Social Support (MSPSS) [15]               | <p>Contrada RJ, Boulifard DA, Hekler EB, et al. Psychosocial factors in heart surgery: presurgical vulnerability and postsurgical recovery. <i>Health Psychology</i> 2008;<b>27</b>(3):309-19.</p> <p>Simning A, Van Wijngaarden E, Fisher SG, Richardson TM, Conwell Y. Mental healthcare need and service utilization in older adults living in public housing. <i>American Journal of Geriatric Psychiatry</i> 2012;<b>20</b>(5):441-51.</p>                                                                                                                                                                                                                                                                                                                                                                                                                                                                                                                                                  |
| Negative Affect Scale [16]                                                    | <p>Burnette D, Mui AC. In-home and community-based service utilization by three groups of elderly Hispanics: a national perspective. <i>Social Work Research</i> 1995;<b>19</b>(4):197-206.</p> <p>Tran TV, Dhooper SS, McInnis-Dittrich K. Utilization of community-based social and health services among foreign born Hispanic American elderly. <i>Journal of Gerontological Social Work</i> 1997;<b>28</b>(4):23-43.</p>                                                                                                                                                                                                                                                                                                                                                                                                                                                                                                                                                                    |
| Nottingham Health Profile Social Isolation subscale [17]                      | <p>Naughton C, Drennan J, Treacy P, et al. How different are older people discharged from emergency departments compared with those admitted to hospital? <i>European Journal of Emergency Medicine</i> 2011;<b>18</b>(1):19-24.</p>                                                                                                                                                                                                                                                                                                                                                                                                                                                                                                                                                                                                                                                                                                                                                             |
| Older Americans Research and Service Center (OARS) Social Resource Scale [18] | <p>Almagro P, Barreiro B, De Echaguen AO, et al. Risk factors for hospital readmission in patients with chronic obstructive pulmonary disease. <i>Respiration</i> 2006;<b>73</b>(3):311-17.</p> <p>Mcauley WJ, Arling G. Use of in-Home Care by Very Old-People. <i>Journal of Health and Social Behavior</i> 1984;<b>25</b>(1):54-64.</p> <p>McCusker J, Healy E, Bellavance F, Connolly B. Predictors of repeat emergency department visits by elders. <i>Academic Emergency Medicine</i> 1997;<b>4</b>(6):581-88.</p>                                                                                                                                                                                                                                                                                                                                                                                                                                                                         |
| Oslo-3 Social Support Scale [19]                                              | <p>Boen H, Dalgard OS, Johansen R, Nord E. Socio-demographic, psychosocial and health characteristics of Norwegian senior centre users: a cross-sectional study. <i>Scandinavian Journal of Public Health</i> 2010;<b>38</b>(5):508-17.</p>                                                                                                                                                                                                                                                                                                                                                                                                                                                                                                                                                                                                                                                                                                                                                      |
| Personal Resource Questionnaire (PRQ2000) [20]                                | <p>Chen Y-J, Narsavage GL. Factors related to chronic obstructive pulmonary disease readmission in Taiwan. <i>Western Journal of Nursing Research</i> 2006;<b>28</b>(1):105-24.</p>                                                                                                                                                                                                                                                                                                                                                                                                                                                                                                                                                                                                                                                                                                                                                                                                              |
| University of California, Los Angeles (UCLA) Loneliness Scale [21]            | <p>[5-item version] Auslander GK, Soffer M, Auslander BA. The supportive community: Help seeking and service use among elderly people in Jerusalem. <i>Social Work Research</i> 2003;<b>27</b>(4):209-21.</p> <p>[10-item version] Cheng ST. Loneliness-distress and physician utilization in well-elderly females. <i>Journal of Community Psychology</i> 1992;<b>20</b>(1):43-56.</p> <p>[9-item version] Penning MJ. Health, social support, and the utilization of health services among older adults. <i>The Journals of Gerontology Series B: Psychological Sciences and Social Sciences</i> 1995; <b>50</b>(5):S330-9.</p>                                                                                                                                                                                                                                                                                                                                                                |
| Wenger Support Network Typology [22]                                          | <p>Eustace A, Denihan A, Bruce I, Cunningham C, Coakley D, Lawlor BA. Depression in the community dwelling elderly: do clinical and sociodemographic factors influence referral to psychiatry? <i>International Journal of Geriatric Psychiatry</i> 2001;<b>16</b>(10):975-9.</p> <p>Naughton C, Drennan J, Treacy P, et al. The role of health and non-health-related factors in repeat emergency department visits in an elderly urban population. <i>Emergency Medicine Journal</i> 2010;<b>27</b>(9):683-87.</p> <p>Naughton C, Drennan J, Treacy P, et al. How different are older people discharged from emergency departments compared with those admitted to hospital? <i>European Journal of</i></p>                                                                                                                                                                                                                                                                                    |

|                                                         |                                                                                                                                                                                                                                                                                                                                                                                                                                                                                                                                                                              |
|---------------------------------------------------------|------------------------------------------------------------------------------------------------------------------------------------------------------------------------------------------------------------------------------------------------------------------------------------------------------------------------------------------------------------------------------------------------------------------------------------------------------------------------------------------------------------------------------------------------------------------------------|
|                                                         | <i>Emergency Medicine</i> 2011; <b>18</b> (1):19-24.                                                                                                                                                                                                                                                                                                                                                                                                                                                                                                                         |
| A measure of social isolation [23]                      | LaVeist TA, Sellers RM, Brown KA, Nickerson KJ. Extreme social isolation, use of community-based senior support services, and mortality among African American elderly women. <i>American Journal of Community Psychology</i> 1997; <b>25</b> (5):721-32                                                                                                                                                                                                                                                                                                                     |
| A measure of social network [24]                        | Mechakra-Tahiri SD, Zunzunegui MV, Dubé M, Prévile M. Associations of social relationships with consultation for symptoms of depression: A community study of depression in older men and women in Québec. <i>Psychological Reports</i> 2011; <b>108</b> (2):537-52.                                                                                                                                                                                                                                                                                                         |
| A measure of social anchorage [25]                      | Rennemark M, Holst G, Fagerstrom C, Halling A. Factors related to frequent usage of the primary healthcare services in old age: findings from The Swedish National Study on Aging and Care. <i>Health &amp; Social Care in the Community</i> 2009; <b>17</b> (3):304-11.                                                                                                                                                                                                                                                                                                     |
| Questionnaire on social network [26]                    | Rodriguez-Artalejo F, Guallar-Castillon P, Herrera MC, et al. Social network as a predictor of hospital readmission and mortality among older patients with heart failure. <i>Journal of Cardiac Failure</i> 2006; <b>12</b> (8):621-627.                                                                                                                                                                                                                                                                                                                                    |
| Question about the number of sources of support [27]    | Tennstedt SL, Crawford S, McKinlay JB. Determining the pattern of community care: is coresidence more important than caregiver relationship? <i>Journals of Gerontology: Social Sciences</i> 1993; <b>48</b> (2):S74-83.                                                                                                                                                                                                                                                                                                                                                     |
| An index of social support [28]                         | Lai DW. Use of home care services by elderly Chinese immigrants. <i>Home Health Care Services Quarterly</i> 2004; <b>23</b> (3):41-56.<br><br>Lai DWL, Kalyniak S. Use of annual physical examinations by aging Chinese Canadians. <i>Journal of Aging and Health</i> 2005; <b>17</b> (5):573-91.<br><br>Lai DWL. Predictors of use of senior centers by elderly Chinese immigrants in Canada. <i>Journal of Ethnic &amp; Cultural Diversity in Social Work: Innovation in Theory, Research &amp; Practice</i> 2006; <b>15</b> (12):97-121.                                  |
| A measure of living arrangements and informal care [29] | Crets S. Determinants of the use of ambulant social care by the elderly. <i>Social Science &amp; Medicine</i> 1996; <b>43</b> (12):1709-20.                                                                                                                                                                                                                                                                                                                                                                                                                                  |
| A measure of satisfaction with social support [30]      | Feld S, George LK. Moderating effects of prior social resources on the hospitalizations of elders who become widowed. <i>Journal of Aging and Health</i> 1994; <b>6</b> :275-95.                                                                                                                                                                                                                                                                                                                                                                                             |
| A measure of social integration [31]                    | Orth-Gomer K, Rosengren A, Wilhelmsen L. Lack of social support and incidence of coronary heart disease in middle-aged Swedish men. <i>Psychosomatic Medicine</i> 1993; <b>55</b> (1):37-43.<br><br>Rosengren A, Wilhelmsen L, Orth-Gomer K. Coronary disease in relation to social support and social class in Swedish men. A 15 year follow-up in the study of men born in 1933. <i>European Heart Journal</i> 2004; <b>25</b> (1):56-63.                                                                                                                                  |
| A measure of social isolation [32]                      | Cloutier-Fisher D, Kobayashi KM. Examining social isolation by gender and geography: conceptual and operational challenges using population health data in Canada. <i>Gender Place and Culture</i> 2009; <b>16</b> (2):181-99.                                                                                                                                                                                                                                                                                                                                               |
| A measure of social network [33]                        | Reed D, McGee D, Yano K, Feinleib M. Social networks and coronary heart disease among Japanese men in Hawaii. <i>American Journal of Epidemiology</i> 1983; <b>117</b> (4):384-96.                                                                                                                                                                                                                                                                                                                                                                                           |
| A measure of social network [34]                        | Reed D, McGee D, Yano K. Psychosocial processes and general susceptibility to chronic disease. <i>American Journal of Epidemiology</i> 1984; <b>119</b> (3):356-70.                                                                                                                                                                                                                                                                                                                                                                                                          |
| A measure of social support [35]                        | Tran TV, Dhooper SS, McInnis-Dittrich K. Utilization of community-based social and health services among foreign born Hispanic American elderly. <i>Journal of Gerontological Social Work</i> 1997; <b>28</b> (4):23-43.                                                                                                                                                                                                                                                                                                                                                     |
| A measure of social support [36]                        | Andre-Petersson L, Hedblad B, Janzon L, Ostergren PO. Social support and behavior in a stressful situation in relation to myocardial infarction and mortality: who is at risk? Results from prospective cohort study "Men born in 1914," Malmo, Sweden. <i>International Journal of Behavioral Medicine</i> 2006; <b>13</b> (4):340-7.                                                                                                                                                                                                                                       |
| A measure of social support [37]                        | Ikeda A, Iso H, Kawachi I, et al. Social support and stroke and coronary heart disease: the JPHC study cohorts II. <i>Stroke</i> 2008; <b>39</b> (3):768-75.                                                                                                                                                                                                                                                                                                                                                                                                                 |
| A measure of social support [38]                        | Kuper H, Adami HO, Theorell T, Weiderpass E. Psychosocial determinants of coronary heart disease in middle-aged women: a prospective study in Sweden. <i>American Journal of Epidemiology</i> 2006; <b>164</b> (4):349-57.                                                                                                                                                                                                                                                                                                                                                   |
| An social network index [39]                            | Rutledge T, Linke SE, Olson MB, et al. Social networks and incident stroke among women with suspected myocardial ischemia. <i>Psychosomatic Medicine</i> 2008; <b>70</b> (3):282-7.                                                                                                                                                                                                                                                                                                                                                                                          |
| Social network type [40]                                | Coe RM, Wolinsky FD, Miller DK, Prendergast JM. Social network relationships and use of physician services. A reexamination. <i>Research on Aging</i> 1984; <b>6</b> (2):243-56. Coe RM,<br><br>Coe RM, Wolinsky FD, Miller DK, Prendergast JM. Complementary and compensatory functions in social network relationships among the elderly. <i>Gerontologist</i> 1984; <b>24</b> (4):396-400<br><br>Wolinsky FD, Miller DK, Prendergast JM. Social network relationships and use of physician services. A reexamination. <i>Research on Aging</i> 1984; <b>6</b> (2):243-56. |
| Social network type – family [41]                       | Coe RM, Wolinsky FD, Miller DK, Prendergast JM. Elderly persons without family support networks and use of health services. A follow-up report on social network relationships. <i>Research on Aging</i> 1985; <b>7</b> (4):617-22.                                                                                                                                                                                                                                                                                                                                          |

|                                                                                                                                                                                                                                                                                                 |                                                                                                                                                                                                                                                                                                                                                                                                                                                                                                                                                                                                                                                                                                                                                                                                                                                                                                                                                                                                                                                                                                                                                                                                                                                                                                                                                                                                                                                                                                                                                                                                                                                                                                                                                                                                                                                                                                                                                                                                                                                                                                                                                                                                                                                                                                                                                                                                                                                                                                                                                                                                                                                                                                                                                                                                                                                                                                                                                                                                                                                                                                                                                                                                                                                                                 |
|-------------------------------------------------------------------------------------------------------------------------------------------------------------------------------------------------------------------------------------------------------------------------------------------------|---------------------------------------------------------------------------------------------------------------------------------------------------------------------------------------------------------------------------------------------------------------------------------------------------------------------------------------------------------------------------------------------------------------------------------------------------------------------------------------------------------------------------------------------------------------------------------------------------------------------------------------------------------------------------------------------------------------------------------------------------------------------------------------------------------------------------------------------------------------------------------------------------------------------------------------------------------------------------------------------------------------------------------------------------------------------------------------------------------------------------------------------------------------------------------------------------------------------------------------------------------------------------------------------------------------------------------------------------------------------------------------------------------------------------------------------------------------------------------------------------------------------------------------------------------------------------------------------------------------------------------------------------------------------------------------------------------------------------------------------------------------------------------------------------------------------------------------------------------------------------------------------------------------------------------------------------------------------------------------------------------------------------------------------------------------------------------------------------------------------------------------------------------------------------------------------------------------------------------------------------------------------------------------------------------------------------------------------------------------------------------------------------------------------------------------------------------------------------------------------------------------------------------------------------------------------------------------------------------------------------------------------------------------------------------------------------------------------------------------------------------------------------------------------------------------------------------------------------------------------------------------------------------------------------------------------------------------------------------------------------------------------------------------------------------------------------------------------------------------------------------------------------------------------------------------------------------------------------------------------------------------------------------|
| <p>Multi-item measures combining questions about frequency of contact with others and participation in activities, e.g. 'Over the last month were you able to: 1) attend events outside of your home (e.g., community or social event); 2) visit friends or family in their own home?' [42]</p> | <p>John R, Roy LC, Dietz TL. Setting priorities in aging populations: formal service use among Mexican American female elders. <i>Journal of Aging &amp; Social Policy</i> 1997;<b>9</b>(1):69-85.</p> <p>Krout JA, Cutler SJ, Coward RT. Correlates of Senior Center Participation - a National Analysis. <i>Gerontologist</i> 1990;<b>30</b>(1):72-79.</p> <p>Molloy GJ, McGee HM, O'Neill D, Conroy RM. Loneliness and emergency and planned hospitalizations in a community sample of older adults. <i>Journal of the American Geriatrics Society</i> 2010. <b>58</b>(8):1538-41.</p> <p>Stump TE, Johnson RJ, Wolinsky FD. Changes in physician utilization over time among older adults. <i>The Journals of Gerontology Series B: Psychological Sciences and Social Sciences</i> 1995;<b>50</b>(1):S45-S58.</p> <p>Wolinsky FD, Johnson RJ. The use of health services by older adults. <i>Journal of Gerontology</i> 1991;<b>46</b>(6):S345-57.</p>                                                                                                                                                                                                                                                                                                                                                                                                                                                                                                                                                                                                                                                                                                                                                                                                                                                                                                                                                                                                                                                                                                                                                                                                                                                                                                                                                                                                                                                                                                                                                                                                                                                                                                                                                                                                                                                                                                                                                                                                                                                                                                                                                                                                                                                                                                                      |
| <p>Question(s) about frequency of face to face and/or phone contact with family and/or friends and/or neighbours, e.g.: 'How many times during the past week did you spend some time with someone who does not live with you?' [43]</p>                                                         | <p>Aliyu MH, Adediran AS, Obisesan TO. Predictors of hospital admissions in the elderly: Analysis of data from the longitudinal study on aging. <i>Journal of the National Medical Association</i> 2003;<b>95</b>(12):1158-67.</p> <p>Almind G, Holstein BE, Holst E, Due P. Old persons' contact with general practitioners in relation to health: a Danish population study. <i>Scandinavian Journal of Primary Health Care</i> 1991;<b>9</b>(4):252-8.</p> <p>Auslander GK, Soffer M, Auslander BA. The supportive community: Help seeking and service use among elderly people in Jerusalem. <i>Social Work Research</i> 2003;<b>27</b>(4):209-21.</p> <p>Barefoot JC, Gronbaek M, Jensen G, Schnohr P, Prescott E. Social network diversity and risks of ischemic heart disease and total mortality: findings from the Copenhagen City Heart Study. <i>American Journal of Epidemiology</i> 2005;<b>161</b>(10):960-7.</p> <p>Burnette D, Mui AC. In-home and community-based service utilization by three groups of elderly Hispanics: a national perspective. <i>Social Work Research</i> 1995;<b>19</b>(4):197-206.</p> <p>Burnette D, Mui AC. Physician utilization by Hispanic elderly persons - National perspective. <i>Medical Care</i> 1999;<b>37</b>(4):362-74.</p> <p>Callahan CM, Wolinsky FD. Hospitalization for major depression among older Americans. <i>Journals of Gerontology - Series A Biological Sciences and Medical Sciences</i> 1995;<b>50</b>(4):M196-202.</p> <p>Calsyn RJ, Winter JP. Who attends senior centers? <i>Journal of Social Service Research</i> 1999;<b>26</b>(2):53-69.</p> <p>Chappell NL. Social support and the receipt of home care services. <i>Gerontologist</i> 1985;<b>25</b>(1):47-54.</p> <p>Chappell NL, Blandford AA. Health-Service Utilization by Elderly Persons. <i>Canadian Journal of Sociology</i> 1987;<b>12</b>(3):195-215.</p> <p>Choi NG. Patterns and determinants of social service utilization: comparison of the childless elderly and elderly parents living with or apart from their children. <i>Gerontologist</i> 1994;<b>34</b>(3):353-62.</p> <p>Choi NG, Wodarski JS. The relationship between social support and health status of elderly people: does social support slow down physical and functional deterioration? <i>Social Work Research</i> 1996;<b>20</b>(1):52-63.</p> <p>Crets S. Determinants of the use of ambulant social care by the elderly. <i>Social Science &amp; Medicine</i> 1996; <b>43</b>(12):1709-20.</p> <p>Dabelko HI, Balaswamy S. Use of adult day services and home health care services by older adults: a comparative analysis. <i>Home Health Care Services Quarterly</i> 2000;<b>18</b>(3):65-79.</p> <p>Feld S, George LK. Moderating effects of prior social resources on the hospitalizations of elders who become widowed. <i>Journal of Aging and Health</i> 1994;<b>6</b>(3):275-95.</p> <p>Frederiks CMA, Wierik MJM, Van Rossum HJL. Factors associated with differential utilization of professional care among elderly people: Residents of old people's homes compared to elderly people living at home. <i>Acta Hospitalia</i> 1991;<b>31</b>(3):33-45.</p> <p>Ginsberg G, Israeli A, Cohen A, Stessman J. Factors predicting emergency room</p> |

utilization in a 70-year-old population. *Israel Journal of Medical Sciences* 1996;**32**(8):649-64.

Hedblad B, Ostergren PO, Hanson BS, Janzon L, Johansson BW, Juul-Moller S. Influence of social support on cardiac event rate in men with ischaemic type ST segment depression during ambulatory 24-h long-term ECG recording. *European Heart Journal* 1992;**13**(4):433-9.

Hyduk CA. The dynamic relationship between social support and health in older adults: Assessment implications. *Journal of Gerontological Social Work* 1996;**27**(1-2):149-65.

Iecovich E, Carmel S. Differences between users and nonusers of day care centers among frail older persons in Israel. *Journal of Applied Gerontology* 2011;**30**(4):443-62.

Jackson SA, Shiferaw B, Anderson RT, Heuser MD, Hutchinson KM, Mittelmark MB. Racial differences in service utilization: the Forsyth County Aging Study. *Journal of Health Care for the Poor & Underserved* 2002;**13**(3):320-33.

Jordan RE, Hawker JL, Ayres JG, et al. Effect of social factors on winter hospital admission for respiratory disease: a case-control study of older people in the UK. *The British Journal of General Practice* 2008;**58**(551):400-2.

Laditka JN, Laditka SB. Increased hospitalization risk for recently widowed older women and protective effects of social contacts. *Journal of Women & Aging* 2003;**15**(2-3):7-7.

Larsson K, Thorslund M, Forsell Y. Dementia and depressive symptoms as predictors of home help utilization among the oldest old: population-based study in an urban area of Sweden. *Journal of Aging and Health* 2004;**16**(5):641-68.

Miltiades HB, Wu B. Factors affecting physician visits in Chinese and Chinese immigrant samples. *Social Science & Medicine* 2008;**66**:704-714.

Nelson MA. Race, gender, and the effects of social supports on the use of health services by elderly individuals. *The International Journal of Aging & Human Development* 1993;**37**(3):227-46.

Ralston PA. Senior center utilization by black elderly adults: social, attitudinal and knowledge correlates. *Journal of Gerontology* 1984; **39**(2):224-9.

Redondo-Sendino A, Guallar-Castillón P, Banegas JR, Rodríguez-Artalejo F. Gender differences in the utilization of health-care services among the older adult population of Spain. *BMC Public Health* 2006;**6**.

Rittner B, Kirk AB. Health care and public transportation use by poor and frail elderly people. *Social Work* 1995;**40**(3):365-73.

Solomon DH, Wagner DR, Marenberg ME, Acampora D, Cooney LM, Jr., Inouye SK. Predictors of formal home health care use in elderly patients after hospitalization. *Journal of the American Geriatrics Society* 1993; **41**(9):961-6.

Starrett RA, Todd AM, Deleon L. A Comparison of the Social-Service Utilization Behavior of the Cuban and Puerto-Rican Elderly. *Hispanic Journal of Behavioral Sciences* 1989;**11**(4):341-53.

Starrett RA, Decker JT, Araujo A, Walters G. The Cuban elderly and their service use. *Journal of Applied Gerontology* 1989;**8**(1):69-85.

Starrett RA, Bresler C, Decker JT, Walters GT, Rogers D. The role of environmental awareness and support networks in Hispanic elderly persons' use of formal social services. *Journal of Community Psychology* 1990;**18**(3):218-27.

Stump TE, Johnson RJ, Wolinsky FD. Changes in physician utilization over time among older adults. *The Journals of Gerontology Series B: Psychological Sciences and Social Sciences* 1995;**50**(1):S45-S58.

Thambypillai V. Utilization of formal social support services by non-institutionalized ill elderly. *Singapore Medical Journal* 1986;**27**(4):281-87.

Vogt TM, Mullooly JP, Ernst D, Pope CR, Hollis JF. Social networks as predictors of ischemic heart disease, cancer, stroke and hypertension: incidence, survival and mortality. *Journal of Clinical Epidemiology* 1992;**45**(6):659-66.

Walter-Ginzburg A, Chetrit A, Medina C, Blumstein T, Gindin J, Modan B. Physician visits, emergency room utilization, and overnight hospitalization in the old-old in Israel: The Cross-Sectional and Longitudinal Aging Study (CALAS). *Journal of the American Geriatrics Society* 2001;**49**(5):549-56.

|                                                                                                                                                                                                                                                                             |                                                                                                                                                                                                                                                                                                                                                                                                                                                                                                                                                                                                                                                                                                                                                                                                                                                                                                                                                                                                                                                                                                                                                                                                                                                                                                                                                                                                                                                                                                                                                                                                                                                                                                                                                                                                        |
|-----------------------------------------------------------------------------------------------------------------------------------------------------------------------------------------------------------------------------------------------------------------------------|--------------------------------------------------------------------------------------------------------------------------------------------------------------------------------------------------------------------------------------------------------------------------------------------------------------------------------------------------------------------------------------------------------------------------------------------------------------------------------------------------------------------------------------------------------------------------------------------------------------------------------------------------------------------------------------------------------------------------------------------------------------------------------------------------------------------------------------------------------------------------------------------------------------------------------------------------------------------------------------------------------------------------------------------------------------------------------------------------------------------------------------------------------------------------------------------------------------------------------------------------------------------------------------------------------------------------------------------------------------------------------------------------------------------------------------------------------------------------------------------------------------------------------------------------------------------------------------------------------------------------------------------------------------------------------------------------------------------------------------------------------------------------------------------------------|
|                                                                                                                                                                                                                                                                             | <p>West GE, Delisle MA, Simard C, Drouin D. Leisure activities and service knowledge and use among the rural elderly. <i>Journal of Aging and Health</i> 1996; <b>8</b>(2):254-79.</p> <p>Wilkins K, Beaudet MP. Changes in social support in relation to seniors' use of home care. <i>Health Reports</i> 2000; <b>11</b>(4):39-47.</p> <p>Wolinsky FD, Johnson RJ. The use of health services by older adults. <i>Journal of Gerontology</i> 1991;46(6):S345-57.</p>                                                                                                                                                                                                                                                                                                                                                                                                                                                                                                                                                                                                                                                                                                                                                                                                                                                                                                                                                                                                                                                                                                                                                                                                                                                                                                                                 |
| Question(s) about the geographical proximity of family and friends [44]                                                                                                                                                                                                     | <p>Nagga K, Dong HJ, Marcusson J, Skoglund SO, Wressle E. Health-related factors associated with hospitalization for old people: Comparisons of elderly aged 85 in a population cohort study. <i>Archives of Gerontology and Geriatrics</i> 2012;<b>54</b>(2):391-397.</p>                                                                                                                                                                                                                                                                                                                                                                                                                                                                                                                                                                                                                                                                                                                                                                                                                                                                                                                                                                                                                                                                                                                                                                                                                                                                                                                                                                                                                                                                                                                             |
| Question(s) about the number of close friends or relatives, e.g. asking respondents for the 'number of friends [they] feel close to' [45]                                                                                                                                   | <p>Chappell NL. Social support and the receipt of home care services. <i>Gerontologist</i> 1985;<b>25</b>(1):47-54.</p> <p>Feld S, George LK. Moderating effects of prior social resources on the hospitalizations of elders who become widowed. <i>Journal of Aging and Health</i> 1994;<b>6</b>:275-95.</p> <p>Lee BW, Conwell Y, Shah MN, Barker WH, Delavan RL, Friedman B. Major depression and emergency medical services utilization in community-dwelling elderly persons with disabilities. <i>International Journal of Geriatric Psychiatry</i> 2008;<b>23</b>(12):1276-82.</p>                                                                                                                                                                                                                                                                                                                                                                                                                                                                                                                                                                                                                                                                                                                                                                                                                                                                                                                                                                                                                                                                                                                                                                                                              |
| Question(s) about participation in social activities such as going to the cinema, sport events, church attendance or volunteering, e.g. 'In the past two weeks, did you go to a show or movie, sports event, club meeting, classes or other group event?' [46]              | <p>Aliyu MH, Adediran AS, Obisesan TO. Predictors of hospital admissions in the elderly: Analysis of data from the longitudinal study on aging. <i>Journal of the National Medical Association</i> 2003;<b>95</b>(12):1158-67.</p> <p>Auslander GK, Soffer M, Auslander BA. The supportive community: Help seeking and service use among elderly people in Jerusalem. <i>Social Work Research</i> 2003;<b>27</b>(4):209-21.</p> <p>Mechakra-Tahiri SD, Zunzunegui MV, Dubé M, Prévile M. Associations of social relationships with consultation for symptoms of depression: A community study of depression in older men and women in Québec. <i>Psychological Reports</i> 2011;<b>108</b>(2):537-52.</p> <p>Starrett RA, Todd AM, Deleon L. A Comparison of the Social-Service Utilization Behavior of the Cuban and Puerto-Rican Elderly. <i>Hispanic Journal of Behavioral Sciences</i> 1989;<b>11</b>(4):341-53.</p> <p>Starrett RA, Decker JT, Araujo A, Walters G. The Cuban elderly and their service use. <i>Journal of Applied Gerontology</i> 1989;<b>8</b>(1):69-85.</p> <p>Starrett RA, Bresler C, Decker JT, Walters GT, Rogers D. The role of environmental awareness and support networks in Hispanic elderly persons' use of formal social services. <i>Journal of Community Psychology</i> 1990;<b>18</b>(3):218-27.</p>                                                                                                                                                                                                                                                                                                                                                                                                                                                              |
| Question(s) about the perceived availability of emotional, tangible, informational and/or other support, e.g. 'Is there someone who would give you any help at all if you were sick or disabled, for example your husband/wife, a member of your family, or a friend?' [47] | <p>Alkema GE, Reyes JY, Wilber KH. Characteristics associated with home- and community-based service utilization for Medicare managed care consumers. <i>Gerontologist</i> 2006;<b>46</b>(2):173-82</p> <p>Barresi CM, McConnell DJ. Adult day care participation among impaired elderly. <i>Lifestyles</i> 1987;<b>8</b>(3-4):82-94.</p> <p>Black BS, Rabins PV, German P, McGuire M, Roca R. Need and unmet need for mental health care among elderly public housing residents. <i>Gerontologist</i> 1997;<b>37</b>(6):717-28.</p> <p>Clay OJ, Roth DL, Safford MM, Sawyer PL, Allman RM. Predictors of Overnight Hospital Admission in Older African American and Caucasian Medicare Beneficiaries. <i>Journals of Gerontology Series a-Biological Sciences and Medical Sciences</i> 2011;<b>66</b>(8):910-16.</p> <p>Ginsberg G, Israeli A, Cohen A, Stessman J. Factors predicting emergency room utilization in a 70-year-old population. <i>Israel Journal of Medical Sciences</i> 1996;<b>32</b>(8):649-64.</p> <p>Hyduk CA. The dynamic relationship between social support and health in older adults: Assessment implications. <i>Journal of Gerontological Social Work</i> 1996;<b>27</b>(1-2):149-65.</p> <p>Jackson SA, Shiferaw B, Anderson RT, Heuser MD, Hutchinson KM, Mittelmark MB. Racial differences in service utilization: the Forsyth County Aging Study. <i>Journal of Health Care for the Poor &amp; Underserved</i> 2002;<b>13</b>(3):320-33.</p> <p>Korten AE, Jacomb PA, Jiao Z, et al. Predictors of GP service use: a community survey of an elderly Australian sample. <i>Australian and New Zealand Journal of Public Health</i> 1998;<b>22</b>(5):609-15.</p> <p>Krause N. Close companions at church, health, and health care use in late life. <i>Journal</i></p> |

|                                                                                                                                                                                                    |                                                                                                                                                                                                                                                                                                                                                                                                                                                                                                                                                                                                                                                                                                                                                                                                                                                                                                                                                                                                                                                                                                                                                                                                                                                                                                                                                                                                                                                                                                                                                                                                                                                                                                                                                                                                                                                                                                                                                                                                                                                                                                                                                                                                                                                                                                                                                                                                                                                                                                                                                                                                                                                                                                                                                                                                                                                                                                                                                                                                                                                               |
|----------------------------------------------------------------------------------------------------------------------------------------------------------------------------------------------------|---------------------------------------------------------------------------------------------------------------------------------------------------------------------------------------------------------------------------------------------------------------------------------------------------------------------------------------------------------------------------------------------------------------------------------------------------------------------------------------------------------------------------------------------------------------------------------------------------------------------------------------------------------------------------------------------------------------------------------------------------------------------------------------------------------------------------------------------------------------------------------------------------------------------------------------------------------------------------------------------------------------------------------------------------------------------------------------------------------------------------------------------------------------------------------------------------------------------------------------------------------------------------------------------------------------------------------------------------------------------------------------------------------------------------------------------------------------------------------------------------------------------------------------------------------------------------------------------------------------------------------------------------------------------------------------------------------------------------------------------------------------------------------------------------------------------------------------------------------------------------------------------------------------------------------------------------------------------------------------------------------------------------------------------------------------------------------------------------------------------------------------------------------------------------------------------------------------------------------------------------------------------------------------------------------------------------------------------------------------------------------------------------------------------------------------------------------------------------------------------------------------------------------------------------------------------------------------------------------------------------------------------------------------------------------------------------------------------------------------------------------------------------------------------------------------------------------------------------------------------------------------------------------------------------------------------------------------------------------------------------------------------------------------------------------------|
|                                                                                                                                                                                                    | <p><i>of Aging and Health</i> 2010;<b>22</b>(4):434-53.</p> <p>Mechakra-Tahiri SD, Zunzunegui MV, Dubé M, Prévile M. Associations of social relationships with consultation for symptoms of depression: A community study of depression in older men and women in Québec. <i>Psychological Reports</i> 2011;<b>108</b>(2):537-52.</p> <p>Molloy GJ, McGee HM, O'Neill D, Conroy RM. Loneliness and emergency and planned hospitalizations in a community sample of older adults. <i>Journal of the American Geriatrics Society</i> 2010. <b>58</b>(8):1538-41.</p> <p>Preville M, Vasiliadis HM, Boyer R, et al. Use of health services for psychological distress symptoms among community-dwelling older adults. <i>Canadian Journal on Aging</i> 2009;<b>28</b>(1):51-61.</p> <p>Rittner B, Kirk AB. Health care and public transportation use by poor and frail elderly people. <i>Social Work</i> 1995;<b>40</b>(3):365-73.</p> <p>Wan TT. Functionally disabled elderly. Health status, social support, and use of health services. <i>Research on Aging</i> 1987;<b>9</b>(1):61-78.</p> <p>Wilkins K, Beaudet MP. Changes in social support in relation to seniors' use of home care. <i>Health Reports</i> 2000; <b>11</b>(4):39-47.</p>                                                                                                                                                                                                                                                                                                                                                                                                                                                                                                                                                                                                                                                                                                                                                                                                                                                                                                                                                                                                                                                                                                                                                                                                                                                                                                                                                                                                                                                                                                                                                                                                                                                                                                                                                                                                              |
| <p>Question(s) about received support, e.g. asking participants whether they received assistance during the past month with 7 tasks, including shopping, housework or going to the doctor [48]</p> | <p>Auslander GK, Soffer M, Auslander BA. The supportive community: Help seeking and service use among elderly people in Jerusalem. <i>Social Work Research</i> 2003;<b>27</b>(4):209-21.</p> <p>Bazargan M, Bazargan S, Baker RS. Emergency department utilization, hospital admissions, and physician visits among elderly African American persons. <i>Gerontologist</i> 1998;<b>38</b>(1):25-36.</p> <p>Chappell NL, Blandford AA. Health-Service Utilization by Elderly Persons. <i>Canadian Journal of Sociology</i> 1987;<b>12</b>(3):195-215.</p> <p>Cho E. The effects of nonprofessional caregivers on the rehospitalization of elderly recipients in home healthcare. <i>Advances in Nursing Science</i> 2007;<b>30</b>(3):E1-12.</p> <p>Choi NG, Wodarski JS. The relationship between social support and health status of elderly people: does social support slow down physical and functional deterioration? <i>Social Work Research</i> 1996;<b>20</b>(1):52-63.</p> <p>Crets S. Determinants of the use of ambulant social care by the elderly. <i>Social Science &amp; Medicine</i> 1996; <b>43</b>(12):1709-20.</p> <p>Frederiks CMA, Wierik MJM, Van Rossum HJL. Factors associated with differential utilization of professional care among elderly people: Residents of old people's homes compared to elderly people living at home. <i>Acta Hospitalia</i> 1991;<b>31</b>(3):33-45.</p> <p>Hakim EA, Bakheit AM. A study of the factors which influence the length of hospital stay of stroke patients. <i>Clinical Rehabilitation</i> 1998;<b>12</b>(2):151-6.</p> <p>Houde SC. Predictors of elders' and family caregivers' use of formal home services. <i>Research in Nursing &amp; Health</i> 1998;<b>21</b>(6):533-43.</p> <p>Jackson SA, Shiferaw B, Anderson RT, Heuser MD, Hutchinson KM, Mittelmark MB. Racial differences in service utilization: the Forsyth County Aging Study. <i>Journal of Health Care for the Poor &amp; Underserved</i> 2002;<b>13</b>(3):320-33.</p> <p>John R, Roy LC, Dietz TL. Setting priorities in aging populations: formal service use among Mexican American female elders. <i>Journal of Aging &amp; Social Policy</i> 1997;<b>9</b>(1):69-85.</p> <p>Kim H-S, Miyashita M, Harada K, Park J-H, So J-M, Nakamura Y. Psychological, social, and environmental factors associated with utilization of senior centers among older adults in Korea. <i>Journal of Preventive Medicine and Public Health</i> 2012;<b>45</b>(4):244-50</p> <p>Larsson K, Thorslund M, Forsell Y. Dementia and depressive symptoms as predictors of home help utilization among the oldest old: population-based study in an urban area of Sweden. <i>Journal of Aging and Health</i> 2004;<b>16</b>(5):641-68.</p> <p>Li LW. Caregiving Network Compositions and Use of Supportive Services by Community-Dwelling Dependent Elders. <i>Journal of Gerontological Social Work</i> 2004;<b>43</b>(2-3):147-64.</p> <p>Miner S. Racial differences in family support and formal service utilization among older</p> |

|                                                                                                                                                                                           |                                                                                                                                                                                                                                                                                                                                                                                                                                                                                                                                                                                                                                                                                                                                                                                                                                                                                                                                                                                                                                                                                                                                                                                                                                            |
|-------------------------------------------------------------------------------------------------------------------------------------------------------------------------------------------|--------------------------------------------------------------------------------------------------------------------------------------------------------------------------------------------------------------------------------------------------------------------------------------------------------------------------------------------------------------------------------------------------------------------------------------------------------------------------------------------------------------------------------------------------------------------------------------------------------------------------------------------------------------------------------------------------------------------------------------------------------------------------------------------------------------------------------------------------------------------------------------------------------------------------------------------------------------------------------------------------------------------------------------------------------------------------------------------------------------------------------------------------------------------------------------------------------------------------------------------|
|                                                                                                                                                                                           | <p>persons: A nonrecursive model. <i>The Journals of Gerontology Series B: Psychological Sciences and Social Sciences</i> 1995;<b>50</b>(3):S143-53.</p> <p>Nelms L, Johnson V, Teshuva K, Foreman P, Stanley J. Social and health factors affecting community service use by vulnerable older people. <i>Australian Social Work</i> 2009;<b>62</b>(4):507-24.</p> <p>Penning MJ. Health, social support, and the utilization of health services among older adults. <i>The Journals of Gerontology Series B: Psychological Sciences and Social Sciences</i> 1995; <b>50</b>(5):S330-9.</p> <p>Safran DG, Graham JD, Osberg JS. Social supports as a determinant of community-based care utilization among rehabilitation patients. <i>Health Services Research</i> 1994;<b>28</b>(6):729-50</p> <p>Smith GC. Patterns and predictors of service use and unmet needs among aging families of adults with severe mental illness. <i>Psychiatric Services</i> 2003;<b>54</b>(6):871-7.</p> <p>Tomassini C, Glaser K, Stuchbury R. Family disruption and support in later life: A comparative study between the United Kingdom and Italy. <i>Journal of Social Issues</i> 2007;<b>63</b>(4):845-63.</p>                                       |
| Question(s) about satisfaction with social relationships and/or participation, e.g. asking participants whether they believe their present level of social activities to be adequate [49] | <p>Auslander GK, Soffer M, Auslander BA. The supportive community: Help seeking and service use among elderly people in Jerusalem. <i>Social Work Research</i> 2003;<b>27</b>(4):209-21.</p> <p>Blalock SJ, Byrd JE, Hansen RA, et al. Factors associated with potentially inappropriate drug utilization in a sample of rural community-dwelling older adults. <i>American Journal Geriatric Pharmacotherapy</i> 2005;<b>3</b>(3):168-79.</p> <p>Boen H, Dalgard OS, Johansen R, Nord E. Socio-demographic, psychosocial and health characteristics of Norwegian senior centre users: a cross-sectional study. <i>Scandinavian Journal of Public Health</i> 2010;<b>38</b>(5):508-17.</p> <p>Callahan CM, Wolinsky FD. Hospitalization for major depression among older Americans. <i>Journals of Gerontology - Series A Biological Sciences and Medical Sciences</i> 1995;<b>50</b>(4):M196-202.</p> <p>Chappell NL. Social support and the receipt of home care services. <i>Gerontologist</i> 1985;<b>25</b>(1):47-54.</p> <p>Conforti DA, Basic D, Rowland JT. Emergency department admissions, older people, functional decline, and length of stay in hospital. <i>Australasian Journal on Ageing</i> 2004;<b>23</b>(4):189-94.</p> |
| Question(s) about the size of a person's network , e.g. number of friends and relatives outside the household [50]                                                                        | <p>Chappell NL. Social support and the receipt of home care services. <i>Gerontologist</i> 1985;<b>25</b>(1):47-54.</p> <p>Chappell NL, Blandford AA. Health-Service Utilization by Elderly Persons. <i>Canadian Journal of Sociology</i> 1987;<b>12</b>(3):195-215.</p> <p>Feld S, George LK. Moderating effects of prior social resources on the hospitalizations of elders who become widowed. <i>Journal of Aging and Health</i> 1994;<b>6</b>:275-95.</p> <p>Vogt TM, Mullooly JP, Ernst D, Pope CR, Hollis JF. Social networks as predictors of ischemic heart disease, cancer, stroke and hypertension: incidence, survival and mortality. <i>Journal of Clinical Epidemiology</i> 1992;<b>45</b>(6):659-66.</p> <p>Wan TT. Functionally disabled elderly. Health status, social support, and use of health services. <i>Research on Aging</i> 1987;<b>9</b>(1):61-78.</p>                                                                                                                                                                                                                                                                                                                                                          |
| Question about time spent alone [51]                                                                                                                                                      | <p>Ginsberg G, Israeli A, Cohen A, Stessman J. Factors predicting emergency room utilization in a 70-year-old population. <i>Israel Journal of Medical Sciences</i> 1996;<b>32</b>(8):649-64.</p>                                                                                                                                                                                                                                                                                                                                                                                                                                                                                                                                                                                                                                                                                                                                                                                                                                                                                                                                                                                                                                          |
| Single-item question about feeling lonely, e.g.: 'How often in the last 12 months have you been bothered by loneliness?' [42]                                                             | <p>Almind G, Holstein BE, Holst E, Due P. Old persons' contact with general practitioners in relation to health: a Danish population study. <i>Scandinavian Journal of Primary Health Care</i> 1991;<b>9</b>(4):252-8.</p> <p>Calsyn RJ, Winter JP. Who attends senior centers? <i>Journal of Social Service Research</i> 1999;<b>26</b>(2):53-69.</p> <p>Eaker ED, Pinsky J, Castelli WP. Myocardial infarction and coronary death among women: psychosocial predictors from a 20-year follow-up of women in the Framingham Study. <i>American Journal of Epidemiology</i> 1992;<b>135</b>(8):854-64.</p> <p>Frederiks CMA, Wierik MJM, Van Rossum HJL. Factors associated with differential utilization of professional care among elderly people: Residents of old people's homes</p>                                                                                                                                                                                                                                                                                                                                                                                                                                                   |



|  |                                                                                                                                                                                                                                                                                                                                                                                                                                                                                                                                                                                                                                                                                                                                                                                                                                                                                                                                                                                                                                                                                                                                                                                  |
|--|----------------------------------------------------------------------------------------------------------------------------------------------------------------------------------------------------------------------------------------------------------------------------------------------------------------------------------------------------------------------------------------------------------------------------------------------------------------------------------------------------------------------------------------------------------------------------------------------------------------------------------------------------------------------------------------------------------------------------------------------------------------------------------------------------------------------------------------------------------------------------------------------------------------------------------------------------------------------------------------------------------------------------------------------------------------------------------------------------------------------------------------------------------------------------------|
|  | <p>compared to elderly people living at home. <i>Acta Hospitalia</i> 1991;<b>31</b>(3):33-45.</p> <p>Ginsberg G, Israeli A, Cohen A, Stessman J. Factors predicting emergency room utilization in a 70-year-old population. <i>Israel Journal of Medical Sciences</i> 1996;<b>32</b>(8):649-64.</p> <p>Lofvenmark C, Mattiasson A-C, Billing E, Edner M. Perceived loneliness and social support in patients with chronic heart failure. <i>European Journal of Cardiovascular Nursing</i> 2009;<b>8</b>(4):251-8.</p> <p>Molloy GJ, McGee HM, O'Neill D, Conroy RM. Loneliness and emergency and planned hospitalizations in a community sample of older adults. <i>Journal of the American Geriatrics Society</i> 2010. <b>58</b>(8):1538-41.</p> <p>Nagga K, Dong HJ, Marcusson J, Skoglund SO, Wressle E. Health-related factors associated with hospitalization for old people: Comparisons of elderly aged 85 in a population cohort study. <i>Archives of Gerontology and Geriatrics</i> 2012;<b>54</b>(2):391-397.</p> <p>Thurston RC, Kubzansky LD. Women, loneliness, and incident coronary heart disease. <i>Psychosomatic Medicine</i> 2009;<b>71</b>(8):836-42.</p> |
|--|----------------------------------------------------------------------------------------------------------------------------------------------------------------------------------------------------------------------------------------------------------------------------------------------------------------------------------------------------------------------------------------------------------------------------------------------------------------------------------------------------------------------------------------------------------------------------------------------------------------------------------------------------------------------------------------------------------------------------------------------------------------------------------------------------------------------------------------------------------------------------------------------------------------------------------------------------------------------------------------------------------------------------------------------------------------------------------------------------------------------------------------------------------------------------------|

## References

1. Berkman LF, Breslow L. *Health and ways of living*. New York: Oxford University Press, 1983.
2. de Jong Gierveld J, van Tilburg T. A 6-item scale for overall, emotional, and social loneliness. *Research on Aging* 2006;**28**(5):582-98.
3. Landerman R, George LK, Campbell RT, Blazer DG. Alternative models of the stress buffering hypothesis. *American Journal of Community Psychology* 1989;**17**(5):625-42.
4. Powers JR, Goodger B, Byles JE. Assessment of the abbreviated Duke Social Support Index in a cohort of older Australian women. *Australasian Journal on Aging* 2004;**23**(2):71-76.
5. Longman JM, M IR, Passey MD, et al. Frequent hospital admission of older people with chronic disease: a cross-sectional survey with telephone follow-up and data linkage. *BMC Health Services Research* 2012;**12**:373.
6. Broadhead WE, Gehlbach SH, de Gruy FV, Kaplan BH. The Duke-UNC Functional Social Support Questionnaire. Measurement of social support in family medicine patients. *Medical Care* 1988;**26**(7):709-23.
7. Mitchell PH, Powell L, Blumenthal J, et al. A short social support measure for patients recovering from myocardial infarction: the ENRICH Social Support Inventory. *Journal of Cardiopulmonary Rehabilitation* 2003;**23**(6):398-403.
8. García-González JV, Díaz-Palacios E, Salamea A, et al. Evaluación de la fiabilidad y validez de una escala de valoración social en el anciano. *Atención Primaria* 1999;**23**(7):434-40.
9. Cohen S, Memelstein R, Kamarck T, Hoberman H. Measuring the functional components of social support. In: Sarason IG, Sarason B, eds. *Social support: Theory, research and application*. The Hague: Martinus Nijhoff, 1985:73-94.
10. Brugha TS, Sturt E, MacCarthy B, Potter J, Wykes T, Bebbington PE. The Interview Measure of Social Relationships: the description and evaluation of a survey instrument for assessing personal social resources. *Social Psychiatry* 1987;**22**(2):123-8.
11. Litwin H. Support Network Type and Health Service Utilization. *Research on Aging* 1997;**19**:274-99.
12. Lubben J. Assessing social networks among elderly populations. *Family and Community Health* 1988;**11**(3):42-52.
13. Lubben J, Blozik E, Gillmann G, et al. Performance of an abbreviated version of the Lubben Social Network Scale among three European community-dwelling older adult populations. *Gerontologist* 2006;**46**(4):503-13.

14. Sherbourne CD, Stewart AL. The MOS Social Support Survey. *Social Science & Medicine* 1991;**32**(713-714).
15. Zimet GD, Dahlem NW, Zimet SG, Farley GK. The Multidimensional Scale of Perceived Social Support. *Journal of Personality Assessment* 1988;**52**(1):30-41.
16. Bradburn NM. *The structure of psychological well-being*. Chicago: Aldine, 1969.
17. Hunt SM, McKenna SP, McEwen J, Williams J, Papp E. The Nottingham Health Profile: subjective health status and medical consultations. *Social Science & Medicine* 1981;**15**(3 Pt 1):221-9.
18. Fillenbaum GG. Multidimensional Functional Assessment of Older Adults: The Duke Older Americans Resources and Services Procedures, 1988.
19. Boen H, Dalgard OS, Johansen R, Nord E. Socio-demographic, psychosocial and health characteristics of Norwegian senior centre users: a cross-sectional study. *Scandinavian Journal of Public Health* 2010;**38**(5):508-17.
20. Weinert C. Evaluation of the Personal Resource Questionnaire: a social support measure. *Birth Defects Original Article Series* 1984;**20**(5):59-97.
21. Russell D, Peplau LA, Ferguson ML. Developing a measure of loneliness. *Journal of Personality Assessment* 1978;**42**(3):290-4.
22. Wenger GC. A network typology: From theory to practice. *Journal of Aging Studies* 1991;**5**(2):147-62.
23. LaVeist TA, Sellers RM, Brown KA, Nickerson KJ. Extreme social isolation, use of community-based senior support services, and mortality among African American elderly women. *American Journal of Community Psychology* 1997;**25**(5):721-32.
24. Mechakra-Tahiri SD, Zunzunegui MV, Dubé M, Prévile M. Associations of social relationships with consultation for symptoms of depression: A community study of depression in older men and women in Québec. *Psychological Reports* 2011;**108**(2):537-52.
25. Rennemark M, Holst G, Fagerstrom C, Halling A. Factors related to frequent usage of the primary healthcare services in old age: findings from The Swedish National Study on Aging and Care. *Health & Social Care in the Community* 2009;**17**(3):304-11.
26. Rodriguez-Artalejo F, Guallar-Castillon P, Herrera MC, et al. Social network as a predictor of hospital readmission and mortality among older patients with heart failure. *Journal of Cardiac Failure* 2006;**12**(8):621-7.
27. Tennstedt SL, Crawford S, McKinlay JB. Determining the pattern of community care: is coresidence more important than caregiver relationship? *Journals of Gerontology: Social Sciences* 1993;**48**(2):S74-83.
28. Lai DWL. Predictors of Use of Senior Centers by Elderly Chinese Immigrants in Canada. *Journal of Ethnic and Cultural Diversity in Social Work* 2006;**15**(1-2):97-121.
29. Crets S. Determinants of the use of ambulant social care by the elderly. *Social Science & Medicine* 1996;**43**(12):1709-20.
30. Feld S, George LK. Moderating effects of prior social resources on the hospitalizations of elders who become widowed. *Journal of Aging and Health* 1994;**6**:275-95.
31. Orth-Gomer K, Rosengren A, Wilhelmsen L. Lack of social support and incidence of coronary heart disease in middle-aged Swedish men. *Psychosomatic Medicine* 1993;**55**(1):37-43.
32. Cloutier-Fisher D, Kobayashi KM. Examining social isolation by gender and geography: conceptual and operational challenges using population health data in Canada. *Gender Place and Culture* 2009;**16**(2):181-99.
33. Reed D, McGee D, Yano K, Feinleib M. Social networks and coronary heart disease among Japanese men in Hawaii. *American Journal of Epidemiology* 1983;**117**(4):384-96.
34. Reed D, McGee D, Yano K. Psychosocial processes and general susceptibility to chronic disease. *American Journal of Epidemiology* 1984;**119**(3):356-70.
35. Tran TV, Dhooper SS, McInnis-Dittrich K. Utilization of community-based social and health services among foreign born Hispanic American elderly. *Journal of Gerontological Social Work* 1997;**28**(4):23-43.

36. Andre-Petersson L, Hedblad B, Janzon L, Ostergren PO. Social support and behavior in a stressful situation in relation to myocardial infarction and mortality: who is at risk? Results from prospective cohort study "Men born in 1914," Malmo, Sweden. *International Journal of Behavioral Medicine* 2006;**13**(4):340-7.
37. Ikeda A, Iso H, Kawachi I, et al. Social support and stroke and coronary heart disease: the JPHC study cohorts II. *Stroke* 2008;**39**(3):768-75.
38. Kuper H, Adami HO, Theorell T, Weiderpass E. Psychosocial determinants of coronary heart disease in middle-aged women: a prospective study in Sweden. *American Journal of Epidemiology* 2006;**164**(4):349-57.
39. Rutledge T, Linke SE, Olson MB, et al. Social networks and incident stroke among women with suspected myocardial ischemia. *Psychosomatic Medicine* 2008;**70**(3):282-7.
40. Coe RM, Wolinsky FD, Miller DK, Prendergast JM. Social network relationships and use of physician services. A reexamination. *Research on Aging* 1984;**6**(2):243-56.
41. Coe RM, Wolinsky FD, Miller DK, Prendergast JM. Elderly persons without family support networks and use of health services. A follow-up report on social network relationships. *Research on Aging* 1985;**7**(4):617-22.
42. Molloy GJ, McGee HM, O'Neill D, Conroy RM. Loneliness and emergency and planned hospitalizations in a community sample of older adults. *Journal of the American Geriatrics Society* 2010;**58**(8):1538-41.
43. Hyduk CA. The dynamic relationship between social support and health in older adults: Assessment implications. *Journal of Gerontological Social Work* 1996;**27**(1-2):149-65.
44. Nagga K, Dong HJ, Marcusson J, Skoglund SO, Wressle E. Health-related factors associated with hospitalization for old people: Comparisons of elderly aged 85 in a population cohort study. *Archives of Gerontology and Geriatrics* 2012;**54**(2):391-97.
45. Lee BW, Conwell Y, Shah MN, Barker WH, Delavan RL, Friedman B. Major depression and emergency medical services utilization in community-dwelling elderly persons with disabilities. *International Journal of Geriatric Psychiatry* 2008;**23**(12):1276-82.
46. Kovar MG, Fitti JE, Chyba MM. The Longitudinal Study of Aging: 1984-90. *Vital Health Statistics, Series 1* 1992(28):1-248.
47. Barresi CM, McConnell DJ. Adult day care participation among impaired elderly. *Lifestyles* 1987;**8**(3-4):82-94.
48. Auslander GK, Soffer M, Auslander BA. The supportive community: Help seeking and service use among elderly people in Jerusalem. *Social Work Research* 2003;**27**(4):209-21.
49. Callahan CM, Wolinsky FD. Hospitalization for major depression among older Americans. *Journals of Gerontology - Series A Biological Sciences and Medical Sciences* 1995;**50**(4):M196-202.
50. Chappell NL, Blandford AA. Health-Service Utilization by Elderly Persons. *Canadian Journal of Sociology* 1987;**12**(3):195-215.
51. Ginsberg G, Israeli A, Cohen A, Stessman J. Factors predicting emergency room utilization in a 70-year-old population. *Israel Journal of Medical Sciences* 1996;**32**(8):649-64.
